# Supplementary material
Source: PubMed Central journal article supplement (PMC7252577)
Supplement: NIHMS1049126-supplement-Sup_1.pdf [file NIHMS1049126-supplement-Sup_1.pdf]

## **EXPLORING THE ROLE OF NATURAL GAS POWER PLANTS WITH CARBON CAPTURE AND STORAGE AS A BRIDGE TO A LOW-CARBON FUTURE**

Journal name: Clean Technologies and Environmental Policy

Samaneh Babaee

Oak Ridge Institute for Science and Education (ORISE) Research Fellow, U.S. Environmental Protection Agency

109 TW Alexander Dr. | Office: E363-02 | Research Triangle Park, NC 27709, USA

babaee.samaneh@epa.gov

Phone: 919-541-2518

ORCID iD: 0000-0001-6917-4541

Daniel H. Loughlin (corresponding author)

Senior Physical Scientist, U.S. Environmental Protection Agency,

109 TW Alexander Dr. | MD E305-02 | Research Triangle Park, NC 27709, USA

loughlin.dan@epa.gov

Phone: 919-541-3928

ORCID iD: 0000-0002-5102-3507

The 2005 to 2055 assumptions related to 20 parameters used for sensitivity runs are listed in Tables S1 through S7. Other parameters that are not included in the following tables have constant value from 2005 to 2055 based on Table 1 of the manuscript. The default values associated with each parameter is based on the EPAUS9r-14-v1.5 database. All costs are based on 2005\$.

Table S1. Natural gas price

| Scenario  | Natural gas price (\$/thousand cubic meter) |      |      |      |      |      |      |      |      |      |      |
|-----------|---------------------------------------------|------|------|------|------|------|------|------|------|------|------|
|           | 2005                                        | 2010 | 2015 | 2020 | 2025 | 2030 | 2035 | 2040 | 2045 | 2050 | 2055 |
| Very low  | 322                                         | 149  | 112  | 129  | 151  | 139  | 152  | 151  | 161  | 173  | 183  |
| Default   | 322                                         | 149  | 123  | 144  | 172  | 198  | 227  | 251  | 277  | 308  | 339  |
| Very high | 322                                         | 149  | 130  | 174  | 225  | 267  | 300  | 346  | 388  | 438  | 488  |

Table S2. NGCC-CCS Investment cost

| Scenario  | Investment cost for NGCC-CCS (M\$/GW) |      |           |
|-----------|---------------------------------------|------|-----------|
|           | 2005-2015                             | 2020 | 2025-2055 |
| Very low  | 1426                                  | 1341 | 1255      |
| Low       | 1506                                  | 1416 | 1326      |
| Default   | 1623                                  | 1525 | 1428      |
| High      | 2025                                  | 1904 | 1782      |
| Very high | 2424                                  | 2279 | 2133      |

Table S3. NGCC retrofit cost

| Scenario  | CO <sub>2</sub> retrofit cost for NGCC (\$/KWh) |       |           |
|-----------|-------------------------------------------------|-------|-----------|
|           | 2005-2015                                       | 2020  | 2025-2055 |
| Very low  | 0.034                                           | 0.031 | 0.027     |
| Low       | 0.039                                           | 0.035 | 0.031     |
| Default   | 0.052                                           | 0.047 | 0.041     |
| High      | 0.068                                           | 0.062 | 0.054     |
| Very high | 0.091                                           | 0.082 | 0.072     |

Table S4. CCS retrofit cost for NGCC

| Scenario  | CCS retrofit cost penalty for NGCC (\$/KWh) |       |           |
|-----------|---------------------------------------------|-------|-----------|
|           | 2005-2015                                   | 2020  | 2025-2055 |
| Default   | 0.052                                       | 0.047 | 0.041     |
| High      | 0.062                                       | 0.056 | 0.049     |
| Very high | 0.083                                       | 0.075 | 0.066     |

Table S5. Electricity storage cost

| Scenario | Electricity storage investment cost (M\$/GW) |      |      |      |           |
|----------|----------------------------------------------|------|------|------|-----------|
|          | 2005-2010                                    | 2015 | 2020 | 2025 | 2030-2055 |
| Very low | 4633                                         | 3725 | 2816 | 1908 | 1000      |
| Low      | 4633                                         | 3975 | 3316 | 2658 | 2000      |
| Default  | 4623                                         | 4623 | 4623 | 4623 | 4623      |

Table S6. The plug-in vehicles market shares in light duty vehicle (LDV) sector

| Vehicle type              | Share of electrified vehicles in LDV sector |      |      |      |      |      |      |           |  |
|---------------------------|---------------------------------------------|------|------|------|------|------|------|-----------|--|
|                           | 2015                                        | 2020 | 2025 | 2030 | 2035 | 2040 | 2045 | 2050-2055 |  |
| Battery electric vehicles | 1%                                          | 2%   | 8%   | 19%  | 29%  | 37%  | 46%  | 49%       |  |
| Plug-in electric vehicles | 4%                                          | 18%  | 53%  | 73%  | 70%  | 62%  | 53%  | 50%       |  |

Table S7. GHG50 scenario characteristics

| Scenario                                                                       | Very low | Low | High | Very high |
|--------------------------------------------------------------------------------|----------|-----|------|-----------|
| 1 GHG50+ Hurdle rate on BIOIGCC-CCS                                            | -        | -   | -    | X         |
| 2 GHG50+ Natural gas price                                                     | X        | -   | -    | -         |
| 3 GHG50+ Natural gas price                                                     | -        | -   | -    | X         |
| 4 GHG50+ Hurdle rate on nuclear                                                | -        | X   | -    | -         |
| 5 GHG50+ Hurdle rate on nuclear                                                | -        | -   | X    | -         |
| 6 GHG50+ Hurdle rate on nuclear                                                | -        | -   | -    | X         |
| 7 GHG50+ Investment cost for NGCC-CCS+ CO <sub>2</sub> retrofit cost for NGCC  | X        | -   | -    | -         |
| 8 GHG50+ Investment cost for NGCC-CCS+ CO <sub>2</sub> retrofit cost for NGCC  | -        | X   | -    | -         |
| 9 GHG50+ Investment cost for NGCC-CCS+ CO <sub>2</sub> retrofit cost for NGCC  | -        | -   | X    | -         |
| 10 GHG50+ Investment cost for NGCC-CCS+ CO <sub>2</sub> retrofit cost for NGCC | -        | -   | -    | X         |
| 11 GHG50+ CO <sub>2</sub> capture rate for NGCC-CCS and CCS retrofit in NGCC   | X        | -   | -    | -         |
| 12 GHG50+ CO <sub>2</sub> capture rate for NGCC-CCS and CCS retrofit in NGCC   | -        | X   | -    | -         |
| 13 GHG50+ CO <sub>2</sub> capture rate for NGCC-CCS and CCS retrofit in NGCC   | -        | -   | X    | -         |
| 14 GHG50+ CO <sub>2</sub> capture rate for NGCC-CCS and CCS retrofit in NGCC   | -        | -   | -    | X         |
| 15 GHG50+ NGCC-CCS efficiency+ CCS retrofit efficiency                         | X        | -   | -    | -         |
| 16 GHG50+ NGCC-CCS efficiency+ CCS retrofit efficiency                         | -        | X   | -    | -         |
| 17 GHG50+ NGCC-CCS efficiency+ CCS retrofit efficiency                         | -        | -   | X    | -         |
| 18 GHG50+ CCS retrofit cost for NGCC                                           | -        | -   | X    | -         |
| 19 GHG50+ CCS retrofit cost for NGCC                                           | -        | -   | -    | X         |
| 20 GHG50+ Hurdle rate for NGCC-CCS and CCS retrofit in NGCC                    | -        | X   | -    | -         |
| 21 GHG50+ Hurdle rate for NGCC-CCS and CCS retrofit in NGCC                    | -        | -   | X    | -         |
| 22 GHG50+ Hurdle rate for NGCC-CCS and CCS retrofit in NGCC                    | -        | -   | -    | X         |
| 23 GHG50+ Battery storage requirement for renewables                           | X        | -   | -    | -         |
| 24 GHG50+ Battery storage requirement for renewables                           | -        | X   | -    | -         |
| 25 GHG50+ CO <sub>2</sub> storage cost                                         | X        | -   | -    | -         |
| 26 GHG50+ CO <sub>2</sub> storage cost                                         | -        | X   | -    | -         |

|                                                      |                                                                                                                       |   |   |   |
|------------------------------------------------------|-----------------------------------------------------------------------------------------------------------------------|---|---|---|
| 27 GHG50+ CO <sub>2</sub> storage cost               | -                                                                                                                     | - | X | - |
| 28 GHG50+ CO <sub>2</sub> storage cost               | -                                                                                                                     | - | - | X |
| 29 GHG50+ Electricity storage investment cost        | X                                                                                                                     | - | - | - |
| 30 GHG50+ Electricity storage investment cost        | -                                                                                                                     | X | - | - |
| 31 GHG50+ Methane leakage rate during extraction     | X                                                                                                                     | - | - | - |
| 32 GHG50+ Methane leakage rate during extraction     | -                                                                                                                     | X | - | - |
| 33 GHG50+ Methane leakage rate during extraction     | -                                                                                                                     | - | X | - |
| 34 GHG50+ Methane leakage rate during extraction     | -                                                                                                                     | - | - | X |
| 35 GHG50+ Max electrification of light duty vehicles | Fixed 99% of LDV fleet purchases                                                                                      |   |   |   |
| 36 GHG50+ Max wind and solar                         | 27,778 billion KWh upper bound on wind + 2,083 billion Kwh lower bound on total wind and solar electricity generation |   |   |   |
| 37 GHG50+ No BIOIGCC-CCS                             | No biomass with CCS plant option                                                                                      |   |   |   |
| 38 GHG50+ No CCS gas retrofit                        | No CCS retrofit option for natural gas combined cycle plants                                                          |   |   |   |
| 39 GHG50+ No lifetime extension on existing coal     | No investment option to extend 50-year lifetime of existing coal plants                                               |   |   |   |
| 40 GHG50+ No gasification technologies               | No biomass- and coal-IGCC plant options                                                                               |   |   |   |
| 41 GHG50+ No lifetime extension on existing nuclear  | No investment option to extend 40-year lifetime of existing nuclear plants                                            |   |   |   |
| 42 GHG50+ High nuclear output                        | 833 billion KWh lower bound limit on electricity from nuclear plants                                                  |   |   |   |
| 43 GHG50                                             | 2050 GHG emissions to be reduced by 50% relative to the 2005 level                                                    |   |   |   |
| 44 GHG50+CO <sub>2</sub> 50                          | 2050 GHG and CO <sub>2</sub> emissions to be reduced by 50% relative to the 2005 level                                |   |   |   |

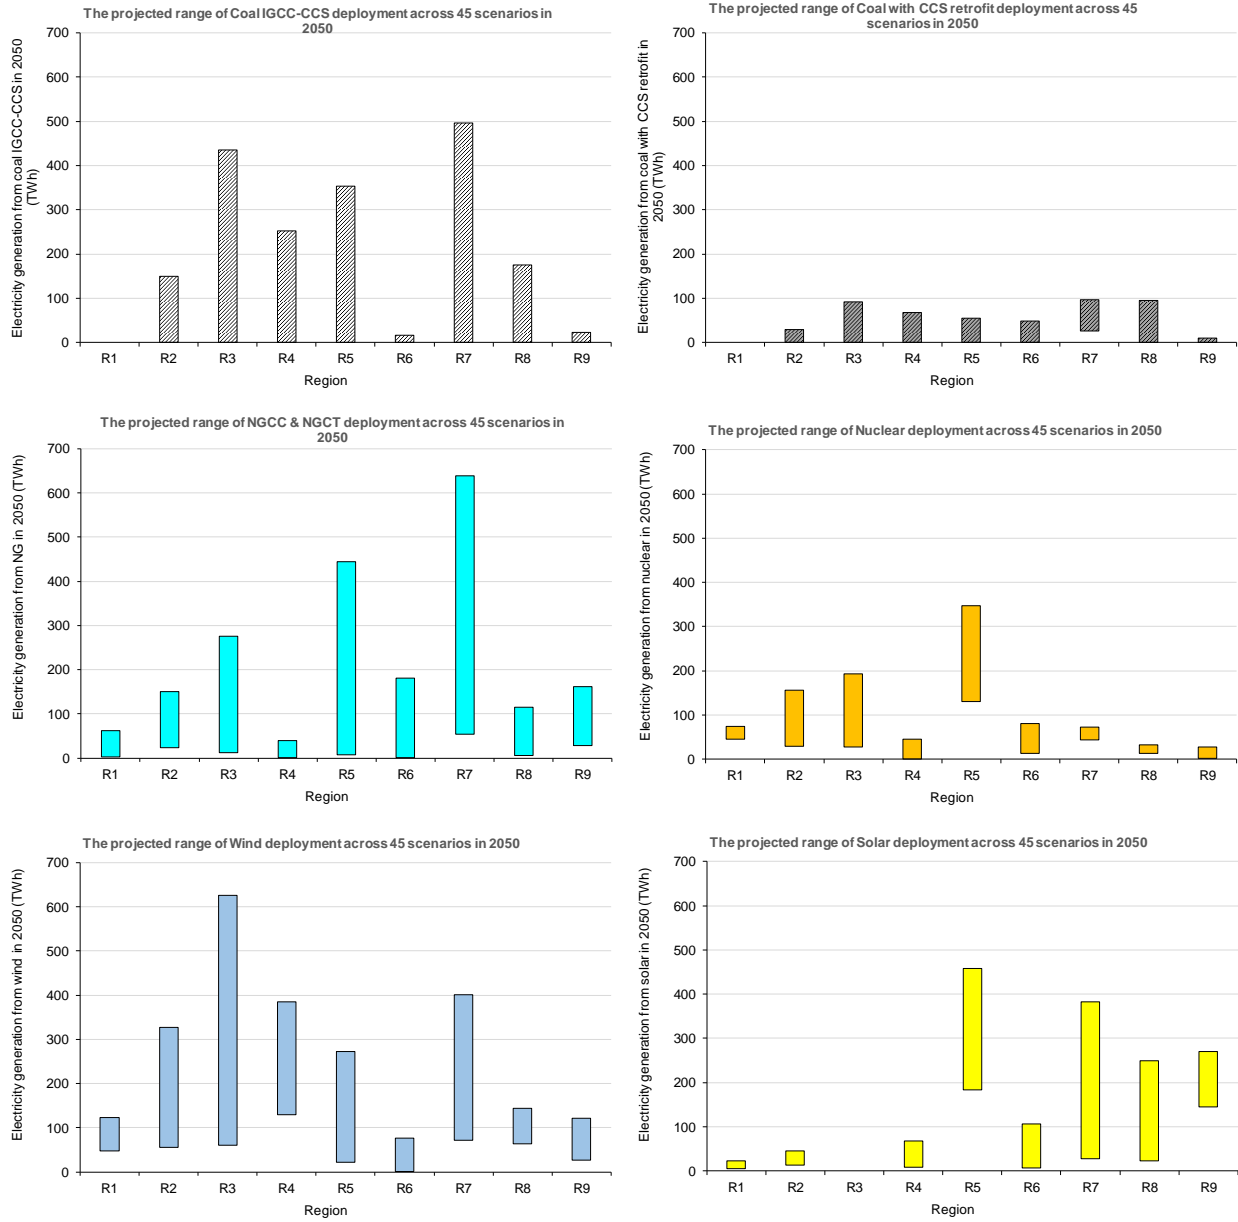

**Fig. S1.** The projected range of power plants adoption across 45 scenarios in each region in 2050.

2050 GHG reductions for the lowest NGCC-CCS scenario

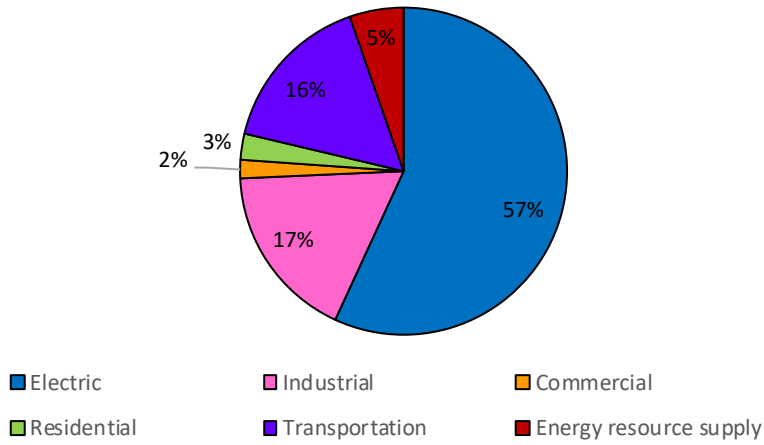

2050 GHG reductions for the highest NGCC-CCS scenario

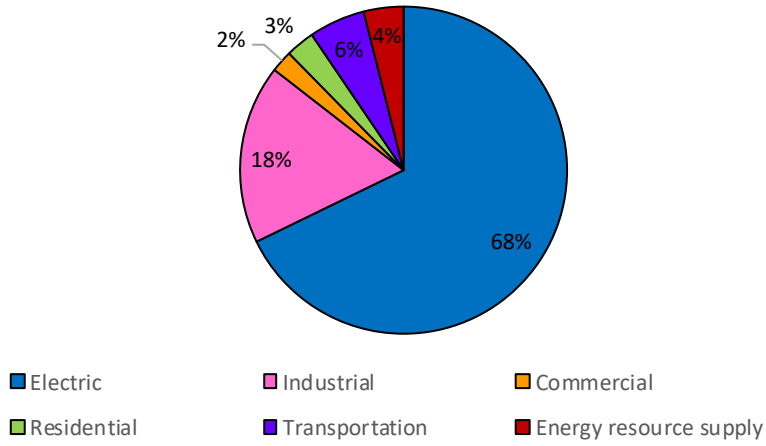

**Fig. S2.** The sector-specific GHG reductions in 2050 for the lowest (top) and the highest (bottom) NGCC-CCS deployment scenarios.

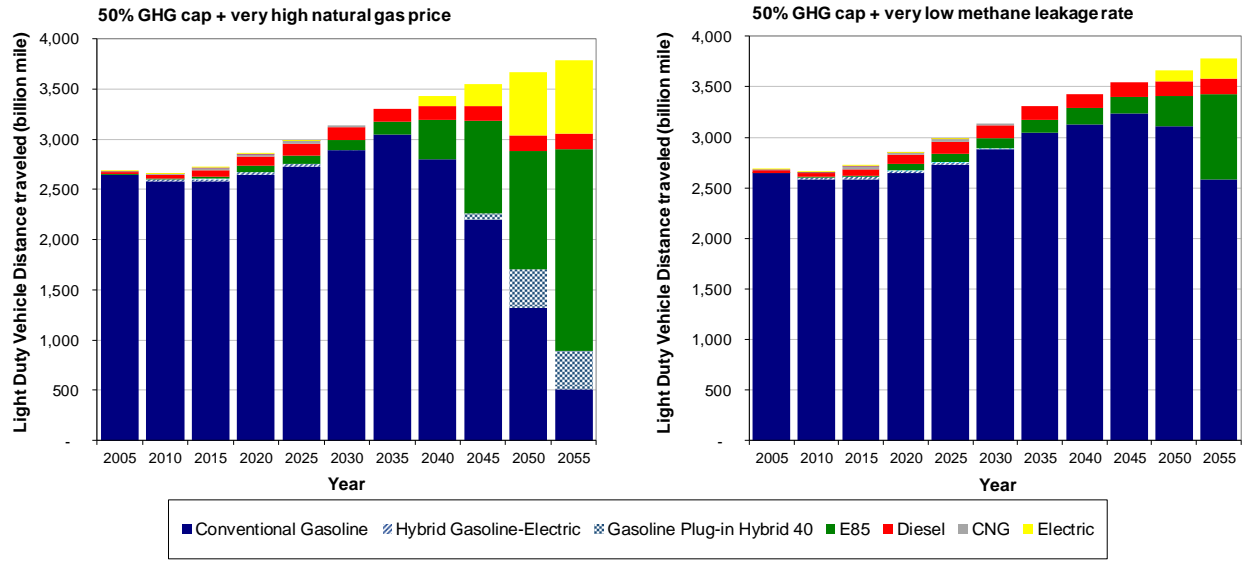

**Fig. S3.** Light duty travel demand by technology type over time for the lowest NGCC-CCS deployment scenario (left) and the highest NGCC-CCS deployment scenario (right).
